# Supplementary material
Source: publisher figshare collection journal article supplement (https://geolsoc.figshare.com/ndownloader/files/14811980)
Supplement: Supplementary file 1 [file 14811980]

Table 2 Major and trace elements compositions of Gongpoquan volcanic rocks in the Xiaohuangshan area.

| Sample No. |  | BA11-56 | BA11-57 | BA11-59 | BA11-60 | BA11-61 | BA11-62 | BS19-1 | BS19-2 | BS19-3 |
| --- | --- | --- | --- | --- | --- | --- | --- | --- | --- | --- |
| SiO2 |  | 56.09 | 55.85 | 56.30 | 52.96 | 54.55 | 52.16 | 52.47 | 54.09 | 52.94 |
| TiO2 |  | 0.81 | 1.24 | 1.21 | 1.09 | 1.00 | 0.97 | 1.13 | 1.05 | 1.22 |
| Al2O3 |  | 17.53 | 17.03 | 17.33 | 20.04 | 16.27 | 20.98 | 16.53 | 15.90 | 16.15 |
| TFe2O3 |  | 17.53 | 17.03 | 17.33 | 20.04 | 16.27 | 20.98 | 4.08 | 3.10 | 3.73 |
| FeO |  | — | — | — | — | — | — | 2.56 | 3.17 | 3.01 |
| MnO |  | 0.11 | 0.11 | 0.12 | 0.11 | 0.11 | 0.11 | 0.09 | 0.08 | 0.09 |
| MgO |  | 6.51 | 7.11 | 7.84 | 6.72 | 7.16 | 6.34 | 6.35 | 5.61 | 5.66 |
| CaO |  | 6.71 | 5.38 | 5.67 | 4.52 | 5.71 | 5.24 | 4.57 | 5.3 | 5.82 |
| Na2O |  | 3.74 | 4.38 | 4.10 | 4.13 | 4.09 | 4.31 | 5.11 | 3.78 | 0.92 |
| K2O |  | 0.87 | 0.56 | 0.58 | 0.63 | 0.72 | 0.61 | 0.63 | 0.88 | 1.65 |
| P2O5 |  | 0.18 | 0.29 | 0.32 | 0.21 | 0.22 | 0.22 | 0.20 | 0.21 | 0.25 |
| LOI |  | 2.33 | 3.90 | 3.03 | 4.85 | 5.82 | 4.39 | 5.97 | 6.63 | 8.68 |
| Total |  | 99.86 | 99.86 | 99.85 | 99.90 | 99.86 | 99.91 | 99.69 | 99.80 | 100.12 |
| σ |  | 1.63 | 1.90 | 1.65 | 2.28 | 2.00 | 2.65 | 2.89 | 1.66 | 0.98 |
| Mg# |  | 63 | 55 | 48 | 60 | 56 | 61 | 82 | 76 | 77 |
| Sc |  | 17.4 | 18.2 | 16.3 | 17.6 | 17.7 | 17.4 | 22.4 | 20.4 | 22.7 |
| V |  | 134 | 125 | 137 | 135 | 132 | 134 | 150 | 157 | 137 |
| Cr |  | 171 | 163 | 164 | 163 | 166 | 170 | 220 | 192 | 166 |
| Co |  | 25.3 | 24.9 | 22.7 | 25.4 | 24.9 | 24.6 | 33.4 | 29.3 | 33 |
| Ni |  | 87.5 | 63.4 | 32.6 | 65.9 | 64.7 | 60.5 | 114 | 102 | 99.7 |
| Ga |  | 17.7 | 18.0 | 19.1 | 17.7 | 17.1 | 17.8 | 18 | 16.7 | 13.3 |
| Li |  | 6.66 | 7.64 | 6.24 | 10.7 | 12.3 | 7.47 | 45.5 | 41.6 | 50 |
| Be |  | 1.02 | 1.22 | 1.53 | 1.25 | 1.25 | 1.23 | 1.2 | 1.12 | 2.03 |
| Cs |  | 0.994 | 1.82 | 1.07 | 1.89 | 1.60 | 1.97 | 4.48 | 9.87 | 9.58 |
| Rb |  | 22.5 | 13.8 | 19.5 | 23.2 | 19.9 | 18.2 | 18.1 | 25 | 48.2 |
| Sr |  | 687 | 439 | 522 | 421 | 488 | 431 | 471 | 452 | 298 |
| Ba |  | 399 | 444 | 479 | 367 | 348 | 358 | 329 | 496 | 588 |
| Th |  | 3.71 | 4.43 | 6.00 | 4.75 | 3.95 | 4.07 | 3.59 | 3.3 | 4.24 |
| U |  | 1.18 | 1.30 | 1.86 | 1.25 | 0.993 | 1.03 | 1.14 | 1 | 1.31 |
| Ta |  | 0.722 | 1.01 | 1.23 | 0.662 | 0.613 | 0.653 | 0.55 | 0.48 | 0.61 |
| Nb |  | 6.40 | 7.25 | 10.91 | 7.26 | 7.23 | 6.74 | 6.16 | 5.82 | 7.42 |
| Hf |  | 3.55 | 4.73 | 7.24 | 5.32 | 4.70 | 4.06 | 4.44 | 4.13 | 5.46 |
| Zr |  | 141 | 195 | 310 | 214 | 185 | 161 | 182 | 171 | 217 |
| Y |  | 17.0 | 24.9 | 30.4 | 23.3 | 24.2 | 22.7 | 20.6 | 19.1 | 22.2 |
| Pb |  | 7.17 | 10.2 | 10.4 | 10.4 | 11.2 | 13.4 | 7.13 | 6.05 | 5.36 |
| La |  | 16.7 | 17.1 | 25.9 | 16.2 | 16.9 | 16.4 | 16.2 | 16.1 | 18.7 |
| Ce |  | 35.8 | 39.2 | 58.1 | 37.0 | 37.5 | 37.3 | 34.4 | 34 | 42.6 |
| Pr |  | 4.36 | 5.01 | 7.21 | 4.65 | 4.70 | 4.66 | 4.23 | 4.21 | 5.4 |
| Nd |  | 18.8 | 22.3 | 31.3 | 20.5 | 20.5 | 20.3 | 19.1 | 18.6 | 24 |
| Sm |  | 3.58 | 4.73 | 6.19 | 4.29 | 4.36 | 4.28 | 4.07 | 4.02 | 5.04 |
| Eu |  | 1.21 | 1.54 | 1.85 | 1.37 | 1.35 | 1.40 | 1.17 | 1.2 | 1.31 |
| Gd |  | 3.74 | 5.16 | 6.47 | 4.68 | 4.78 | 4.65 | 4.19 | 3.96 | 4.69 |
| Tb |  | 0.562 | 0.813 | 0.991 | 0.744 | 0.774 | 0.744 | 0.71 | 0.63 | 0.74 |
| Dy |  | 3.29 | 4.82 | 5.85 | 4.49 | 4.70 | 4.40 | 4.08 | 3.68 | 4.43 |
| Ho |  | 0.674 | 0.981 | 1.18 | 0.924 | 0.971 | 0.902 | 0.84 | 0.76 | 0.87 |
| Er |  | 1.88 | 2.74 | 3.37 | 2.66 | 2.79 | 2.56 | 2.37 | 2.15 | 2.51 |
| Tm |  | 0.294 | 0.420 | 0.521 | 0.411 | 0.442 | 0.404 | 0.35 | 0.33 | 0.38 |
| Yb |  | 1.87 | 2.66 | 3.31 | 2.68 | 2.85 | 2.59 | 2.16 | 1.94 | 2.29 |
| Lu |  | 0.284 | 0.394 | 0.500 | 0.401 | 0.432 | 0.381 | 0.33 | 0.28 | 0.36 |
| (La/Sm)N |  | 2.93 | 2.27 | 2.64 | 2.37 | 2.43 | 2.40 | 2.50 | 2.52 | 2.33 |
| (La/Yb)N |  | 6.02 | 4.33 | 5.29 | 4.07 | 3.99 | 4.25 | 5.06 | 5.60 | 5.51 |

Table 2 continued

| Sample No. |  | BS17-1 | BS17-2 | BS17-3 | BS44-1 | BS20-1 | BS20-2 | BS20-3 | BS20-4 | BS20-5 |
| --- | --- | --- | --- | --- | --- | --- | --- | --- | --- | --- |
| SiO2 |  | 49.38 | 50.22 | 49.57 | 57.71 | 51.51 | 48.30 | 50.56 | 51.29 | 50.12 |
| TiO2 |  | 0.58 | 0.48 | 0.59 | 0.85 | 1.09 | 1.56 | 1.35 | 1.15 | 1.72 |
| Al2O3 |  | 15.49 | 13.93 | 15.53 | 17.61 | 23.97 | 22.49 | 24.03 | 24.01 | 22.65 |
| TFe2O3 |  | 3.96 | 3.49 | 3.30 | 6.61 | 4.44 | 6.07 | 4.46 | 4.26 | 4.73 |
| FeO |  | 1.93 | 3.64 | 2.22 | 3.21 | 3.36 | — | 3.87 | 3.31 | — |
| MnO |  | 0.23 | 0.21 | 0.19 | 0.09 | 0.06 | 0.08 | 0.06 | 0.06 | 0.06 |
| MgO |  | 7.6 | 10.45 | 7.34 | 5.43 | 2.30 | 3.73 | 2.26 | 2.25 | 2.61 |
| CaO |  | 15.4 | 11.73 | 13.19 | 5.90 | 10.66 | 11.46 | 11.01 | 11.07 | 11.18 |
| Na2O |  | 2.36 | 2.31 | 3.41 | 3.80 | 3.09 | 2.57 | 2.99 | 3.28 | 2.77 |
| K2O |  | 0.56 | 0.71 | 0.39 | 1.77 | 1.01 | 1.19 | 1.09 | 0.93 | 1.26 |
| P2O5 |  | 0.07 | 0.04 | 0.08 | 0.23 | 0.36 | 0.33 | 0.42 | 0.41 | 0.50 |
| LOI |  | 2.06 | 2.67 | 3.63 | 3.55 | 1.49 | 1.79 | 1.72 | 1.25 | 1.64 |
| Total |  | 99.64 | 99.88 | 99.44 | 99.92 | 99.98 | 99.57 | 99.96 | 99.96 | 99.26 |
| σ |  | 1.11 | 1.11 | 1.80 | 2.11 | 1.86 | 2.67 | 2.04 | 2.02 | 2.29 |
| Mg# |  | 88 | 84 | 85 | 75 | 85 | 81 | 84 | 86 | 84 |
| Sc |  | 40.1 | 44.4 | 37.1 | 23.3 | 8.63 | 26.85 | 8.10 | 8.52 | 18.97 |
| V |  | 247 | 189 | 214 | 148 | 125 | 250 | 131 | 119 | 173 |
| Cr |  | 355 | 473 | 191 | 87.4 | 19.7 | 36.8 | 15.8 | 18.6 | 18.0 |
| Co |  | 38.5 | 45 | 21.6 | 24.8 | 15.2 | 17.3 | 13.3 | 12.2 | 14.9 |
| Ni |  | 71.4 | 128 | 43.8 | 59.2 | 11.9 | 37.9 | 8.5 | 8.8 | 37.8 |
| Ga |  | 15.6 | 12.1 | 12.6 | 19.6 | 26.6 | 29.2 | 27.7 | 25.8 | 30.9 |
| Li |  | 3.33 | 16.4 | 11.4 | 11.1 | 0.87 | 14.47 | 2.96 | 1.67 | 11.41 |
| Be |  | 0.61 | 0.45 | 0.38 | 1.05 | 2.91 | 4.01 | 3.09 | 3.27 | 3.05 |
| Cs |  | 0.22 | 1.49 | 0.79 | 0.513 | 3.67 | — | 2.76 | 3.42 | — |
| Rb |  | 0.79 | 15.6 | 8.08 | 43.9 | 37.7 | 70.8 | 46.0 | 33.8 | 65.9 |
| Sr |  | 564 | 409 | 506 | 531 | 632 | 916 | 588 | 619 | 731 |
| Ba |  | 24.2 | 174 | 110 | 397 | 212 | 263 | 218 | 188 | 245 |
| Th |  | 0.51 | 0.46 | 0.53 | 4.49 | 3.24 | 2.14 | 3.35 | 3.51 | 6.30 |
| U |  | 0.42 | 0.25 | 1.61 | 0.753 | 1.35 | 0.79 | 1.16 | 1.32 | 1.89 |
| Ta |  | 0.2 | 0.22 | 0.23 | 0.239 | 1.05 | 0.48 | 1.17 | 0.92 | 0.72 |
| Nb |  | 1.46 | 1.36 | 1.66 | 3.11 | 16.8 | 15.5 | 19.1 | 15.6 | 22.6 |
| Hf |  | 1.2 | 0.93 | 1.2 | 3.11 | 17.5 | 3.55 | 12.4 | 16.7 | 10.82 |
| Zr |  | 34.6 | 28 | 34.7 | 107 | 689 | 147 | 488 | 667 | 681 |
| Y |  | 12.1 | 9.29 | 13.2 | 16.1 | 24.1 | 33.4 | 25.4 | 25.5 | 35.2 |
| Pb |  | 9.51 | 7.08 | 4.72 | 5.55 | 11.5 | 7.39 | 11.1 | 10.6 | 9.03 |
| La |  | 3.96 | 2.96 | 6.66 | 18.7 | 22.4 | 20.1 | 25.5 | 22.9 | 31.7 |
| Ce |  | 8.16 | 6.72 | 14.2 | 34.7 | 51.6 | 44.3 | 55.8 | 53.2 | 65.1 |
| Pr |  | 1.19 | 0.97 | 1.94 | 4.46 | 6.15 | 6.17 | 7.02 | 6.52 | 8.18 |
| Nd |  | 6.32 | 5.07 | 9.39 | 17.1 | 26.4 | 28.1 | 30.5 | 28.5 | 35.3 |
| Sm |  | 1.65 | 1.42 | 2.06 | 4.12 | 5.76 | 6.72 | 6.38 | 6.24 | 7.38 |
| Eu |  | 0.44 | 0.43 | 0.76 | 1.32 | 2.24 | 1.79 | 2.29 | 2.29 | 2.29 |
| Gd |  | 1.95 | 1.69 | 2.4 | 3.45 | 4.66 | 6.18 | 5.27 | 5.00 | 7.61 |
| Tb |  | 0.34 | 0.28 | 0.43 | 0.598 | 0.86 | 1.22 | 0.96 | 0.92 | 1.35 |
| Dy |  | 2.11 | 1.79 | 2.56 | 2.81 | 4.50 | 6.11 | 4.90 | 4.93 | 6.36 |
| Ho |  | 0.44 | 0.38 | 0.54 | 0.535 | 0.88 | 1.09 | 0.91 | 0.91 | 1.12 |
| Er |  | 1.35 | 1.11 | 1.57 | 1.52 | 2.34 | 3.33 | 2.47 | 2.45 | 3.48 |
| Tm |  | 0.2 | 0.17 | 0.24 | 0.251 | 0.36 | 0.41 | 0.36 | 0.37 | 0.43 |
| Yb |  | 1.27 | 1.07 | 1.47 | 1.38 | 2.34 | 2.67 | 2.30 | 2.34 | 2.74 |
| Lu |  | 0.2 | 0.16 | 0.22 | 0.205 | 0.33 | 0.37 | 0.32 | 0.33 | 0.41 |
| (La/Sm)N |  | 1.51 | 1.31 | 2.03 | 2.23 | 2.45 | 1.88 | 2.51 | 2.31 | 2.70 |
| (La/Yb)N |  | 2.10 | 1.87 | 3.05 | 4.44 | 6.45 | 5.07 | 7.47 | 6.60 | 7.79 |

Note: Major elements are analyzed using XRF (in wt %), trace elements using ICP-MS (in ppm)

σ = (Na2O+K2O)2/(SiO2-43%)
